# Supplementary material
Source: publisher figshare collection journal article supplement (https://springernature.figshare.com/ndownloader/files/7504990)
Supplement: Supplementary file 1 [file 7504990]

**Additional file 1: PCRs programs and primers used for amplification and sequencing**

PCRs cycles for SSU of initial denaturation at 94°C during 5min. Followed by 35 cycles of: (*i*) 94°C for 30sec; (*ii*) 60°C for 1min and (*iii*) 72°C for 2min. Final extension step at 72°C for 7 minutes. PCRs for ITS, 5.8S and partial LSU were performed as described in (Hoef-Emden & Melkonian 2003).

**Table 1:** Primers used for PCR and sequencing reactions

| **Primers for SSU PCR** | |  |
| --- | --- | --- |
|  | **Sequences of oligonucleotides (5’- 3’)** |  |
| 18S5' | CCA CCT GGT TGA TCC TGC CAG T | (Sogin 1990) |
| 18S 3' | GAT CCT TCT GCA GGT TCA CCT ACG GAA | (Sogin 1990) |
| **Primers for SSU sequencing** | |  |
| 18S5' | CCA CCT GGT TGA TCC TGC CAG T | (Sogin 1990) |
| 528F | CGG TAA TTC CAG CTC C | (Sogin 1990) |
| 1055F | GGT GGT GCA TGG CCG | (Bellori*n et a*l. 2002) |
| 18S 3' | GAT CCT TCT GCA GGT TCA CCT ACG GAA | (Sogin 1990) |
| 536R | GAA TTA CCG CGG CTG CTG | (Bir*d et a*l. 1992) |
| 1055R | CGG CCA TGC ACC ACC | (Bir*d et a*l. 1992) |
| **Primers for ITS1 and 2, 5.8S and partial LSU PCR** | | |
| SSU1400F | CTG CCC TTT GTA CAC ACC GCC CGT C | (Hoef-Emden & Melkonian 2003) |
| ITS05R-700 | TAC TTG TTC GCT ATC GGT CTC T | (Hoef-Emden & Melkonian 2003) |
| **Primers for ITS1 and 2, 5.8S and partial LSU sequencing** | | |
| SSU1400F | CTG CCC TTT GTA CAC ACC GCC CGT C | (Hoef-Emden & Melkonian 2003) |
| ITS03F-700 | CGA TGA AGA ACG YAG CGA | (Hoef-Emden & Melkonian 2003) |
| 28S5’R | ATA TGC TTA ART TCA GCG GGT | (Bellori*n et a*l. 2002) |
| ITS05R-800 | TAC TTG TTC GCT ATC GGT CTC T | (Hoef-Emden & Melkonian 2003) |

**References**

Bellorin, A.M., Oliveira, M.C. & Oliveira, E.C. 2002. Phylogeny and systematics of the marine algal family Gracilariaceae (Gracilariales, Rhodophyta) based on small subunit rDNA and its sequences of Atlantic and Pacific species. *J. Phycol.* **38**: 551–563.

Bird, C.J., Rice, E.L., Murphy, C. a. & Ragan, M. A. 1992. Phylogenetic relationships in the Gracilariales (Rhodophyta) as determined by 18S rDNA sequences. *Phycologia* **31**: 510–522.

Hoef-Emden, K. & Melkonian, M. 2003. Revision of the genus *Cryptomonas* (Cryptophyceae): a combination of molecular phylogeny and morphology provides insights into a long-hidden dimorphism. *Protist* **154**: 371–409.

Sogin, M.L. 1990. Amplification of ribosomal RNA genes for molecular evolution studies. *In* Innes, M. A., Gelfand, D. H., Snisnky, J. J., & White, T. J. (Eds). PCR protocols*.* A guide to methods and applications. Academic Press, San Diego, pp. 307–314.
